# Supplementary material
Source: Frontiers journal article supplement (https://www.frontiersin.org/articles/149093)
Supplement: Table_1.PDF [file Table_1.PDF]

Online Supplement to  
 “From descriptive indices of intransitivity to quantitative  
 assessments: A commentary on Kalenscher et al. 2010.”

Nicholas Brown, Clinton P. Davis-Stober, Michel Regenwetter

*Random preference model of lexicographic semiorders (RPLS):*

Let  $\mathcal{LSO}$  be the (finite) collection of lexicographic semiorders, let  $P_{\succ}$  denote the probability of  $\succ \in \mathcal{LSO}$ . The binary choice probability,  $p(x, y)$  that a decision maker chooses  $x$  when offered the choice between  $x$  and  $y$  is

$$p(x, y) = \sum_{\substack{\text{preference states } \succ \in \mathcal{LSO} \\ \text{in which } x \succ y}} P_{\succ} + \frac{1}{2} \sum_{\substack{\text{preference states } \succ \in \mathcal{LSO} \\ \text{in which } x \not\succeq y \text{ and } y \not\succeq x}} P_{\succ}. \quad (1)$$

*Lexicographic semiorder error model (LSE):*

Let  $\succ \in \mathcal{LSO}$  be the (unknown) fixed lexicographic semiorder. The binary choice probability,  $p(x, y)$  that a decision maker chooses  $x$  when offered the choice between  $x$  and  $y$  is

$$p(x, y) \begin{cases} \in [\frac{1}{2}, 1] & \text{if } x \succ y, \\ \in [\frac{1}{4}, \frac{3}{4}] & \text{if } x \not\succeq y \text{ and } y \not\succeq x, \\ \in [0, \frac{1}{2}] & \text{if } y \succ x. \end{cases} \quad (2)$$

The LSE model forms a complicated non-disjoint union of convex polytopes. While computing its Bayes factor is not computationally expensive, computing a frequentist p-value would require very extensive computation, hence we omit it.

Table 1 provides the frequentist p-values for the random preference model of transitivity (RPT), weak stochastic transitivity (WST), and the random preference model of lexicographic semiorders (RPLS).

Table 1: Reanalysis of Kalenscher et al.’s data. For each of 30 participants, we report the Kalenscher et al. degree of intransitivity score (K. Index) and p-values for goodness-of-fit tests of RPT, WST and RPLS. We boldface K. Index values ( $> 0.3$ ) that fail to support transitivity. We italicize p-values less than .05, indicating lack of fit for that model. Entries with a “✓” correspond to choice data that perfectly satisfies the constraints of that model, hence a perfect fit.

| Participant | K. Index    | RPT            | WST             | RPLS           |
|-------------|-------------|----------------|-----------------|----------------|
| 1           | .21         | ✓              | ✓               | .41            |
| 2           | <b>.36</b>  | <i>&lt;.01</i> | <i>.03</i>      | <i>&lt;.01</i> |
| 3           | <b>.605</b> | <i>&lt;.01</i> | <i>&lt;.01</i>  | .43            |
| 4           | .065        | 0.12           | ✓               | .22            |
| 5           | <b>.30</b>  | <i>&lt;.01</i> | <i>&lt;.01</i>  | .05            |
| 6           | <b>.36</b>  | .81            | .48             | <i>&lt;.01</i> |
| 7           | <b>.31</b>  | <i>.02</i>     | .45             | <i>.03</i>     |
| 8           | .005        | ✓              | ✓               | .99            |
| 9           | .26         | ✓              | .56             | .62            |
| 10          | <b>.41</b>  | .27            | .20             | <i>&lt;.01</i> |
| 11          | .26         | .22            | ✓               | <i>.01</i>     |
| 12          | .15         | ✓              | ✓               | .32            |
| 13          | <b>.43</b>  | <i>&lt;.01</i> | <i>&lt;0.01</i> | .05            |
| 14          | .050        | .29            | ✓               | .39            |
| 15          | <b>.33</b>  | <i>&lt;.01</i> | <i>&lt;.01</i>  | .05            |
| 16          | <b>.37</b>  | <i>&lt;.01</i> | <i>&lt;.01</i>  | <i>.02</i>     |
| 17          | <b>.42</b>  | .55            | .72             | <i>&lt;.01</i> |
| 18          | .050        | .95            | ✓               | .69            |
| 19          | <b>.39</b>  | .30            | .44             | <i>&lt;.01</i> |
| 20          | <b>.39</b>  | .22            | .36             | <i>.03</i>     |
| 21          | <b>.43</b>  | .46            | .48             | <i>&lt;.01</i> |
| 22          | <b>.36</b>  | <i>&lt;.01</i> | <i>&lt;.01</i>  | .99            |
| 23          | .20         | <i>&lt;.01</i> | .66             | <i>&lt;.01</i> |
| 24          | <b>.42</b>  | ✓              | .69             | <i>.02</i>     |
| 25          | <b>.40</b>  | .46            | .05             | .17            |
| 26          | .29         | ✓              | ✓               | <i>.03</i>     |
| 27          | <b>.35</b>  | ✓              | ✓               | <i>&lt;.01</i> |
| 28          | <b>.33</b>  | .73            | .44             | <i>.04</i>     |
| 29          | .25         | .07            | ✓               | <i>&lt;.01</i> |
| 30          | .0067       | ✓              | ✓               | .69            |
